# Supplementary material for: The crystallographic observation of mesitylene–mesitylene and mesitylene–CH2Cl2–mesitylene adducts trapped in an irregular cavity
Source: Royal Society of Chemistry journal article supplement (doi:10.1039/c4ce01403k), 2014-01-01
Supplement: c4ce01403k1.pdf [file c4ce01403k1.pdf]

## Electronical supporting information

# The crystallographic observation for mesitylene-mesitylene and mesitylene-CH<sub>2</sub>Cl<sub>2</sub>-mesitylene adducts trapped in irregular cavity

Yu Chen,<sup>a,b</sup> Li Ma,<sup>a</sup> Zheng Bian,<sup>a\*</sup> Rizhe Jin,<sup>a</sup> Chuanqing Kang,<sup>a</sup> Zongjun Li,<sup>c</sup> Xiang Gao,<sup>c</sup> Fushe Han,<sup>a</sup> Xuepeng Qiu,<sup>a</sup> and Lianxun Gao<sup>a</sup>

<sup>a</sup>State Key Laboratory of Polymer Physics and Chemistry, Changchun Institute of Applied Chemistry, Chinese Academy of Sciences, 5625 Renmin Street, Changchun, China, 130022, E-mail: bianzh@ciac.ac.cn.

<sup>b</sup>The University of Chinese Academy of Sciences, Beijing, China, 100864.

<sup>c</sup>State Key Laboratory of Electroanalytical Chemistry, Changchun Institute of Applied Chemistry, Chinese Academy of Sciences, 5625 Renmin Street, Changchun, China, 130022.

### Materials and measurements

Complex **1** is prepared according to the method reported previously.<sup>1</sup> Crystal **1**•mesitylene and **1**•mesitylene•CH<sub>2</sub>Cl<sub>2</sub> were picked for X-ray structural analysis on a Bruker SMART CCD diffractometer with a Mo-K<sub>α</sub> radiation source ( $\lambda = 0.71073 \text{ \AA}$ ). The structures were solved and refined by full matrix least-squares on  $F^2$  values (SHELXL-97).<sup>2</sup> Non-hydrogen atoms were refined anisotropically. Hydrogen atoms were fixed at calculated positions and were refined using a riding mode. TEM observations were performed on a JEOL JEM-1011 transmission electron microscope operated at an acceleration voltage of 100 kV. Samples were prepared by wiping a small amount of gel samples onto carbon-coated copper grid followed by naturally evaporating the solvent. SEM pictures were taken using an XL 30 ESEM FEG field emission scanning electron microscope with 20 kV operating voltage. PXRD patterns were recorded by Rigaku D/max 2000 X-ray diffractometer with CuK<sub>α</sub>1 radiation source.

### Computations

The geometrical structures of mesitylene-mesitylene and mesitylene-CH<sub>2</sub>Cl<sub>2</sub>-mesitylene cluster were optimized at the B3LYP/6-31G(d) level. The CH/ $\pi$  interaction energies were calculated at the MP2/aug-cc-pVDZ level.<sup>3</sup> All the calculations were completed by employing Gaussian 09 program.

### References

- 1 a) L. Ma, R. Jin, Z. Bian, C. Kang, Y. Chen, J. Xu and L. Gao, *Chem. Eur. J.*, 2012, **18**, 13168; b) L. Ma, R. Z. Jin, G. H. Lv, Z. Bian, M. X. Ding and L. X. Gao, *Synthesis*, 2007, **16**, 2461.
- 2 A. L. Spek, *J. Appl. Crystallogr.*, 2003, **36**, 7.
- 3 A. Fujii, K. Shibasaki, T. Kazama, R. Itaya, N. Mikami and S. Tsuzuki, *Phys. Chem. Chem. Phys.*, 2008, **10**, 2836.
